# Supplementary material for: Stimuli-Responsive Rifampicin-Based Macromolecules
Source: MDPI journal article supplement (doi:10.3390/ma13173843), 2020-08-31
Supplement: s1 [file s1]

*Supplementary Materials*

# **Stimuli-Responsive Rifampicin-Based Macromolecules**

---

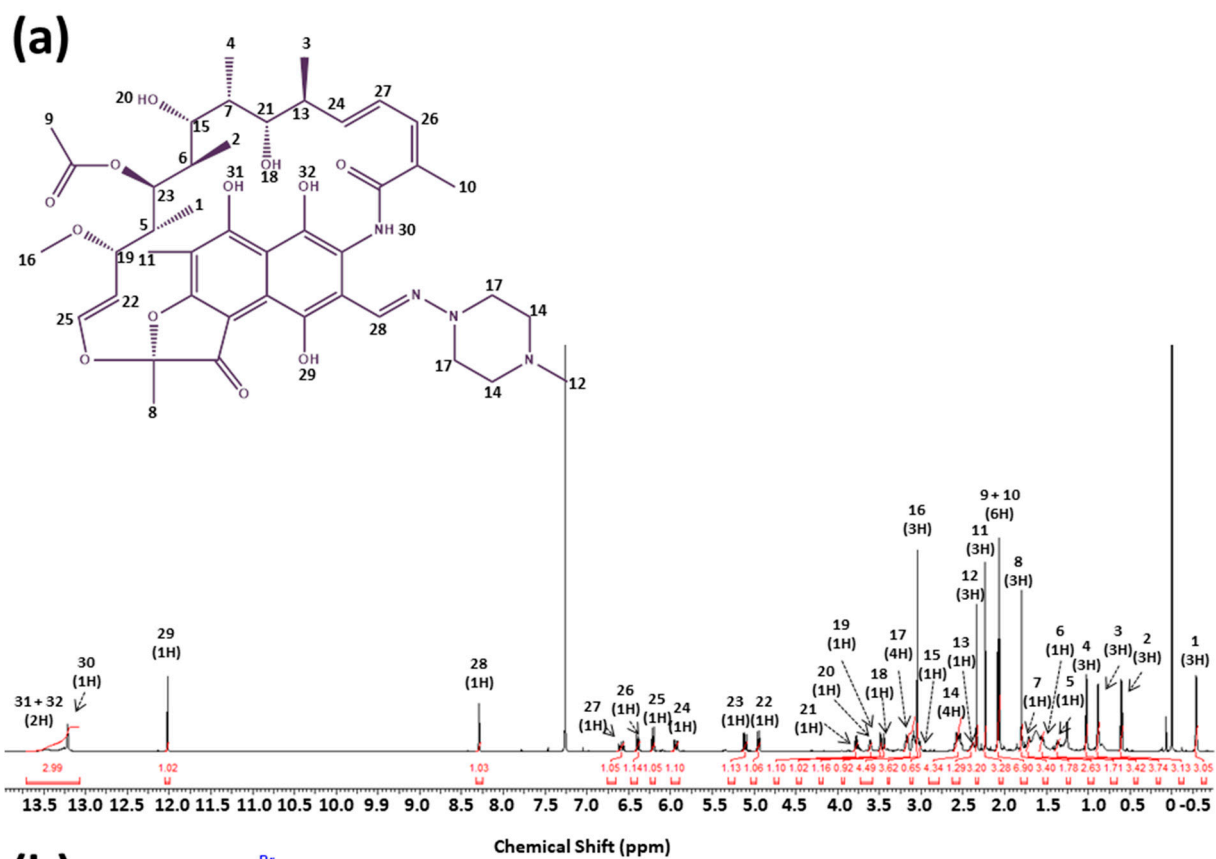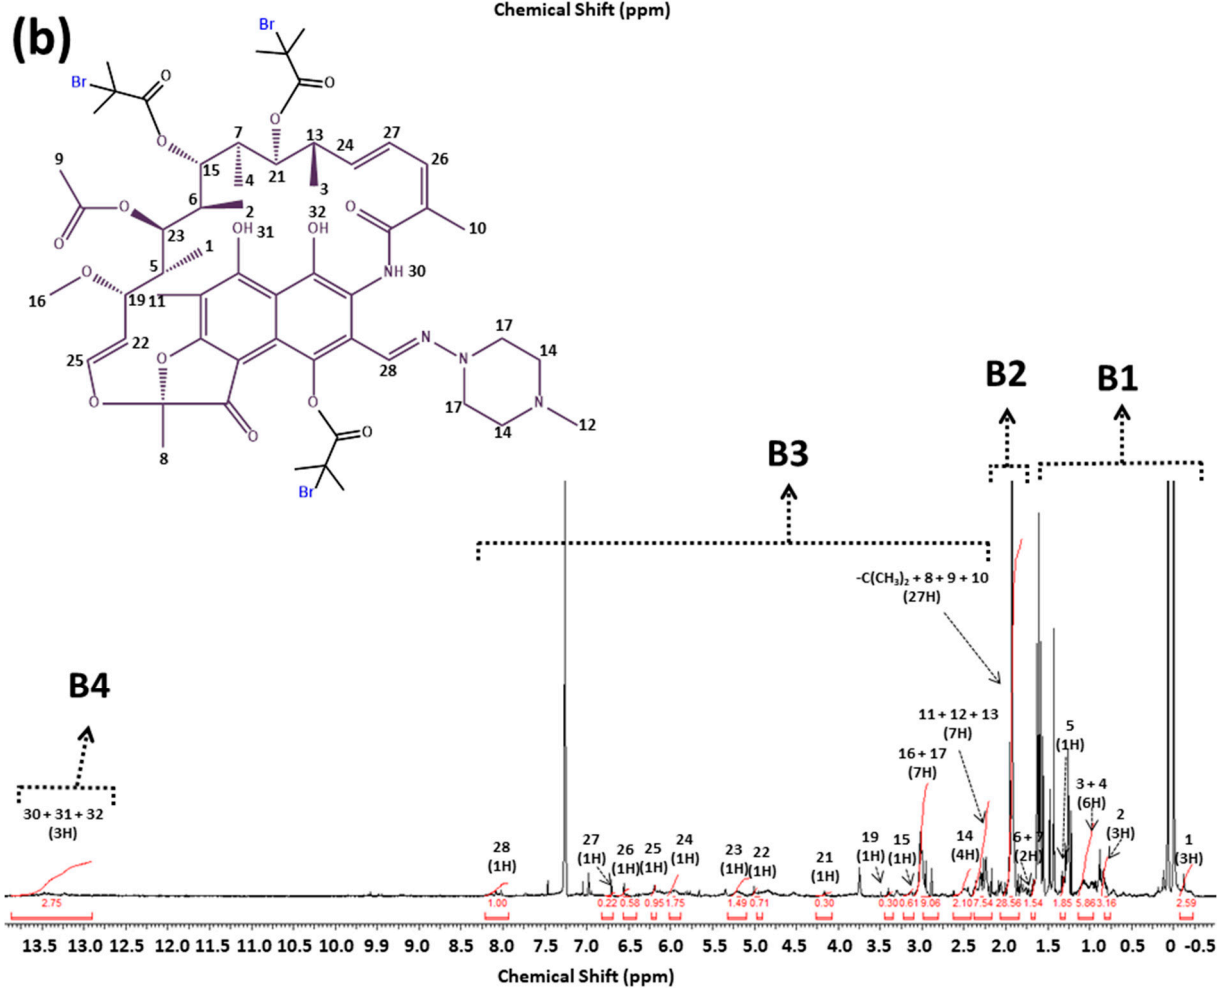

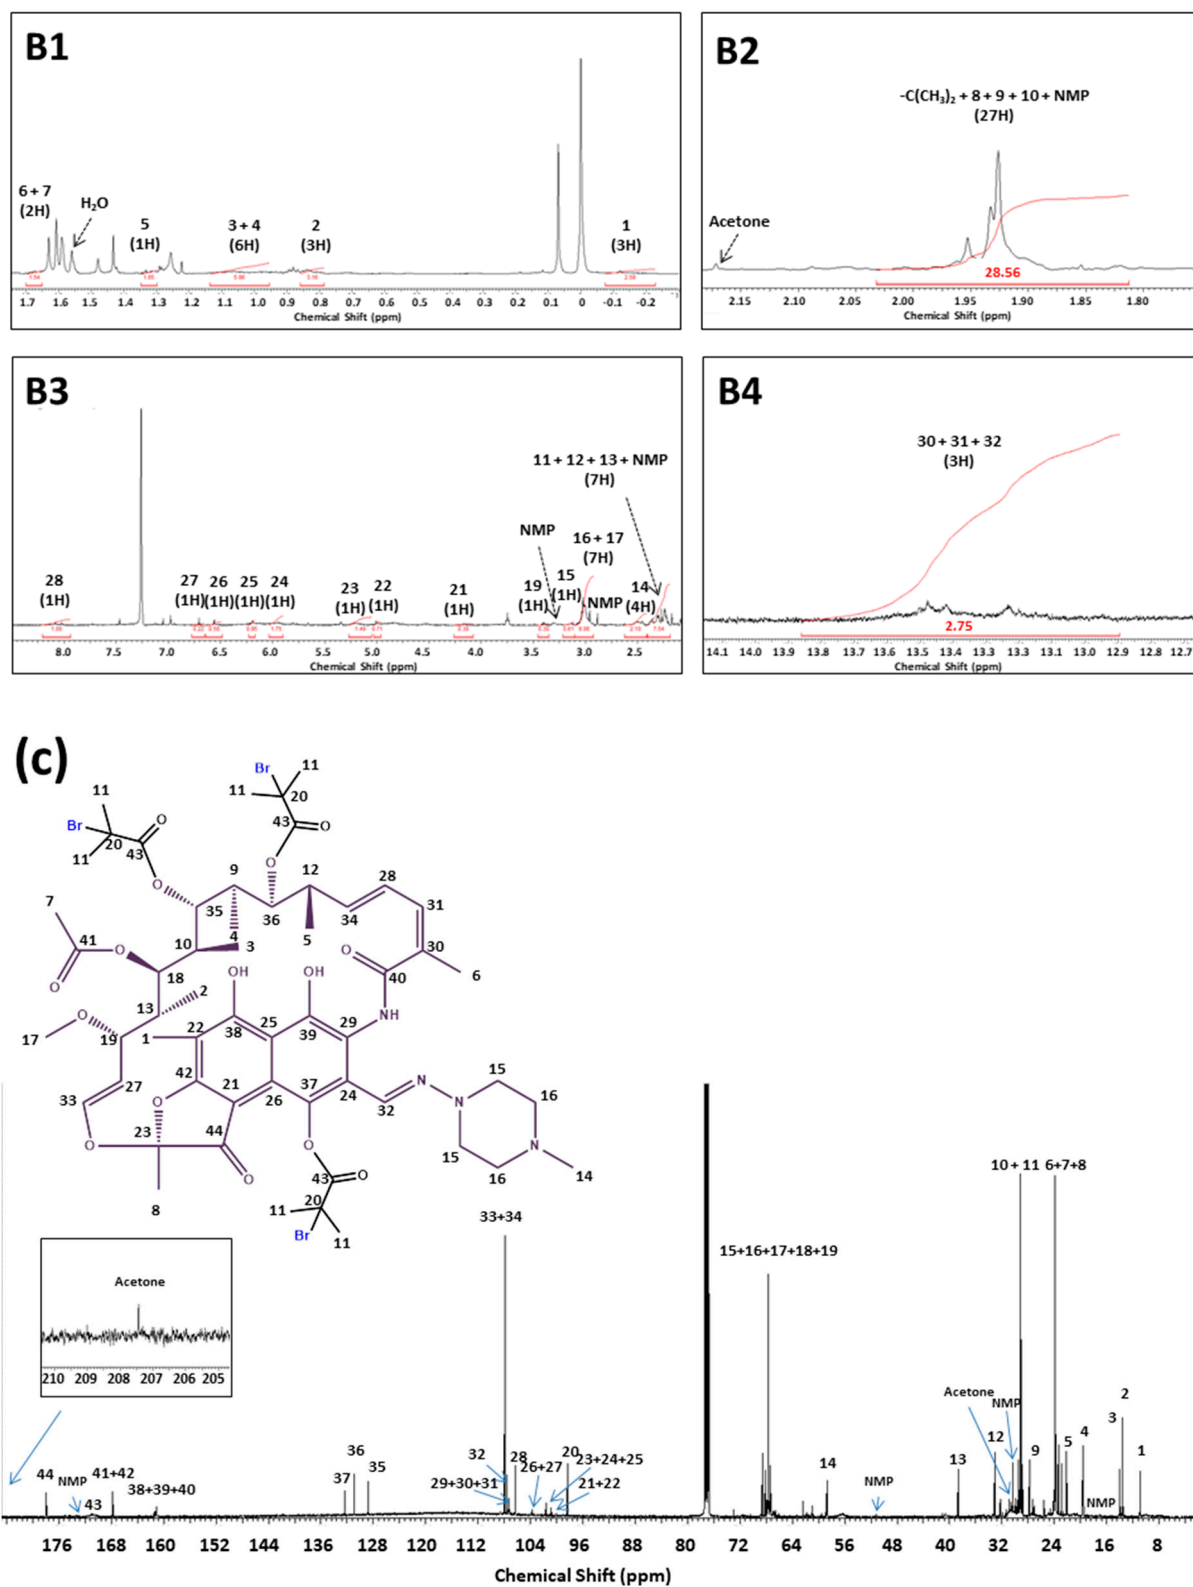

**Figure S1.**  $^1\text{H}$  NMR of (a) rifampicin ( $\text{CDCl}_3$ ); (b)  $^1\text{H}$  NMR and (c)  $^{13}\text{C}$  NMR of Rif-Br<sub>3</sub> supramolecular initiator ( $M_n = 1269.94$ ,  $D = 1.19$ ) after purification ( $\text{CDCl}_3$ ).

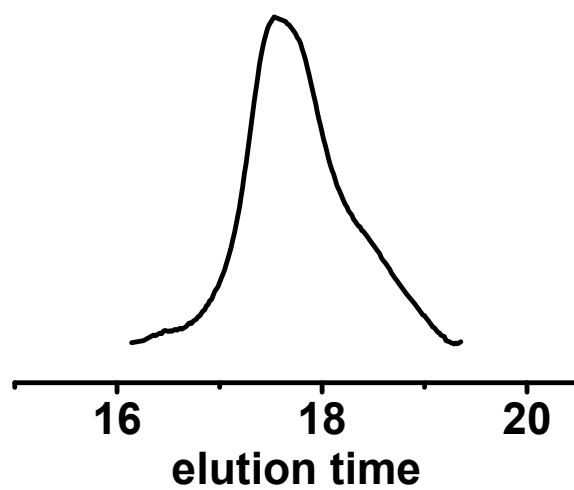

Figure S2. GPC trace of Rif-Br<sub>3</sub> macroinitiator.

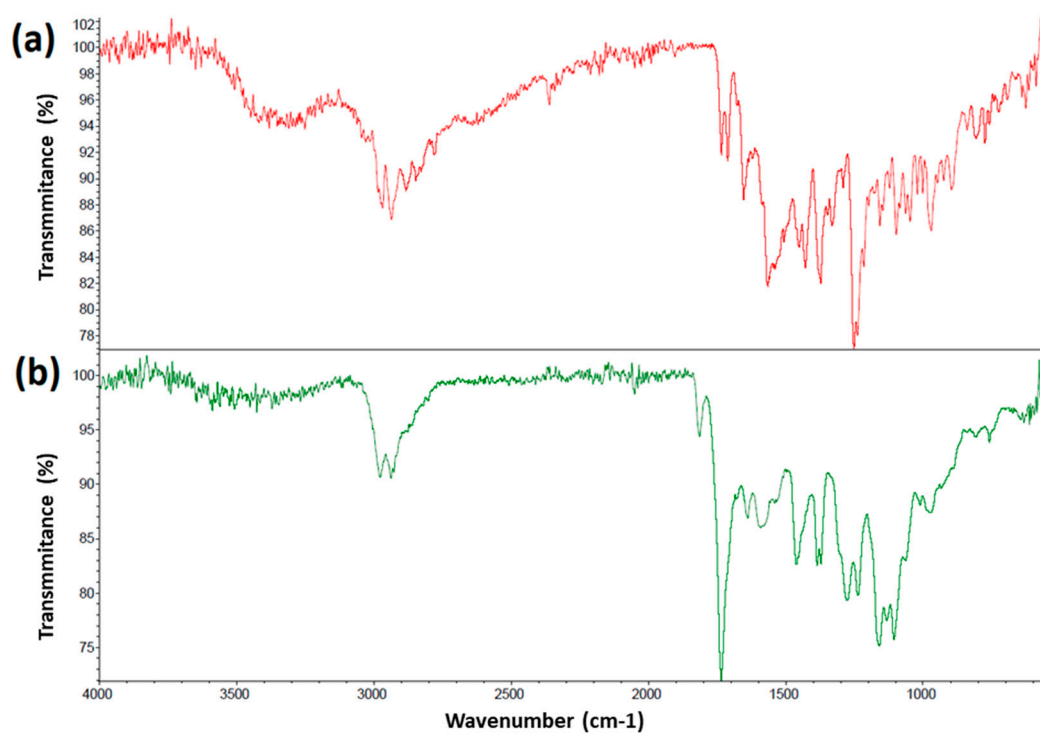

Figure S3. FT-IR characterization of (a) rifampicin and (b) Rif-Br<sub>3</sub> macroinitiator.

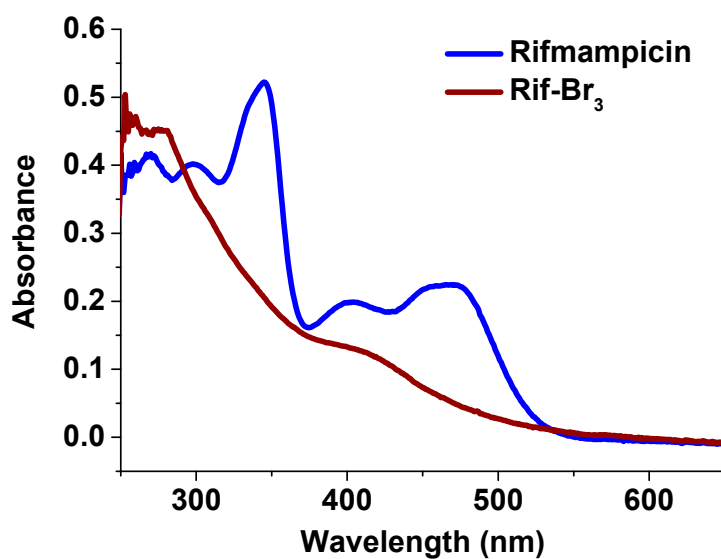

Figure S4. UV-vis spectrum of rifampicin and Rif-Br<sub>3</sub> macroinitiator in THF.

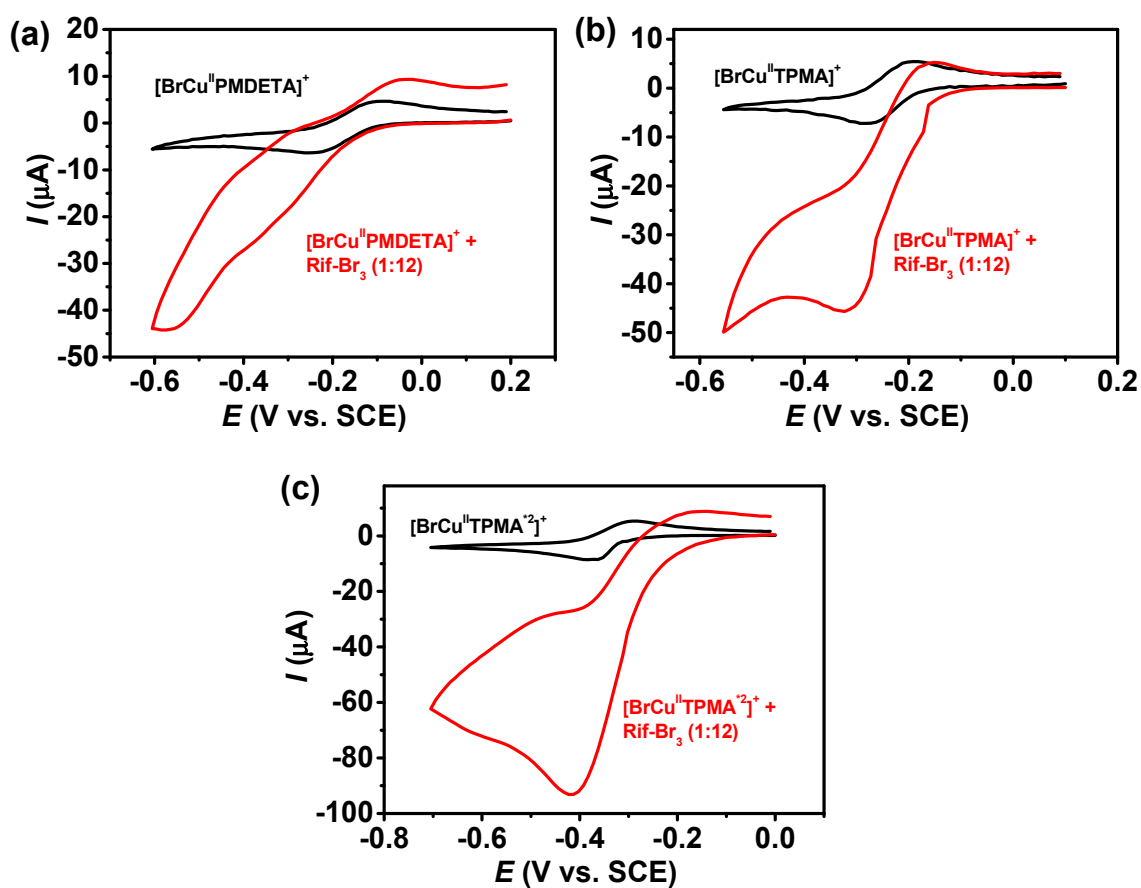

Figure S5. Cyclic voltammogram of 0.8 mM Cu<sup>II</sup>Br<sub>2</sub>/L in DMF containing 0.2 M TBAP in the absence (black line) and in the presence of 9.8 mM Rif-Br<sub>3</sub> (red line) recorded at  $\nu = 0.1 \text{ V}\cdot\text{s}^{-1}$ , where L (ligand) is (a) PMDETA, (b) TPMA and (c) TPMA<sup>2-</sup>.

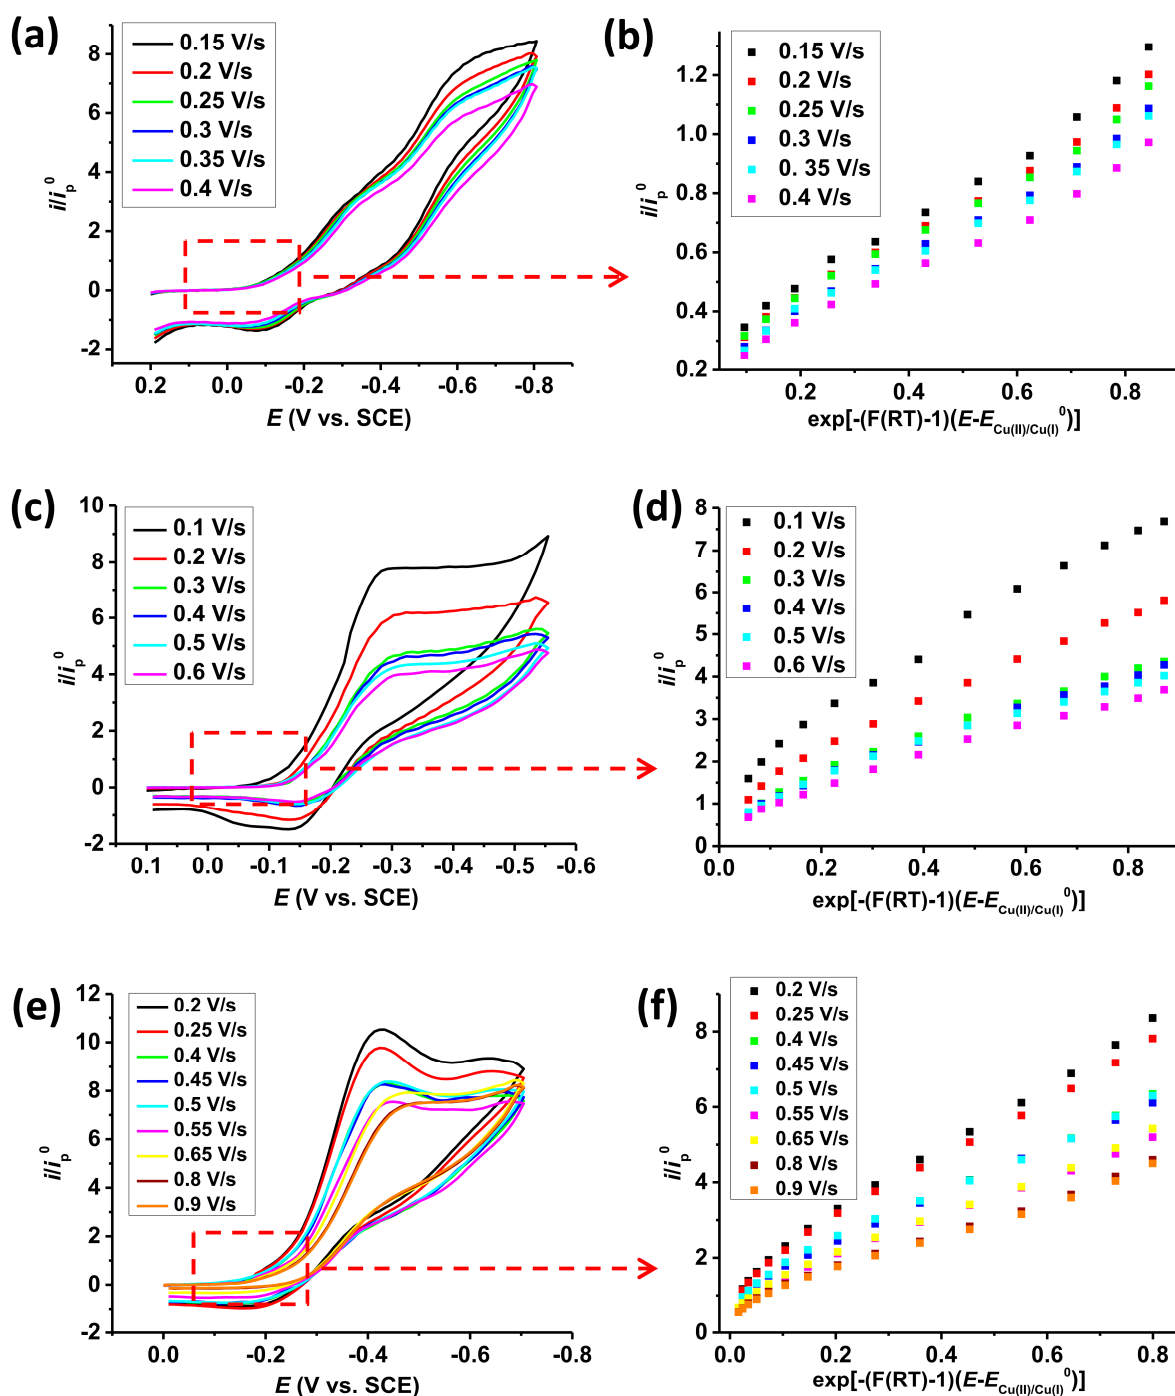

**Figure S6.** Cyclic voltammograms of 0.8 mM  $\text{Cu}^{\text{II}}\text{Br}_2/\text{L}$  in DMF recorded at a different scan rates (given next to the curves) in the presence of 9.8 mM Rif- $\text{Br}_3$  (3 Br molecules) and 39.9 mM TEMPO; the current was normalized with respect to the peak current ( $i_p^0$ ) recorded in the absence of Rif- $\text{Br}_3$ , where L (ligand) is (a) PMDETA, (c) TPMA and (e)  $\text{TPMA}^{*2}$ ; Foot-of-the-wave analysis of the catalytic peak to determine  $k_a$ , the slope  $a$  of the plots of  $i/i_p^0$  vs.  $\exp[-F(E-E_{\text{Cu(II)/Cu(I)}}^0)/RT]$ :  $a = 2.24 \sqrt{\frac{k_a C_A^0 RT}{Fv}}$ , where  $i$ —catalytic current,  $i_p^0$ —reversible one-electron reduction of the copper catalyst complex in the absence of Rif- $\text{Br}_3$ ,  $C_A^0$ —initial Rif-(P $n$ BA-Br) $_3$  concentration,  $F$ —Faraday constant,  $R$ —gas constant,  $T = 298$  K,  $E_{\text{Cu}^{\text{II}}/\text{Cu}^{\text{I}}}^0$  is the half wave potential of the  $\text{Cu}^{\text{II}}\text{Br}_2/\text{L}$ , using (b) PMDETA, (d) TPMA and (e)  $\text{TPMA}^{*2}$  as a ligand.

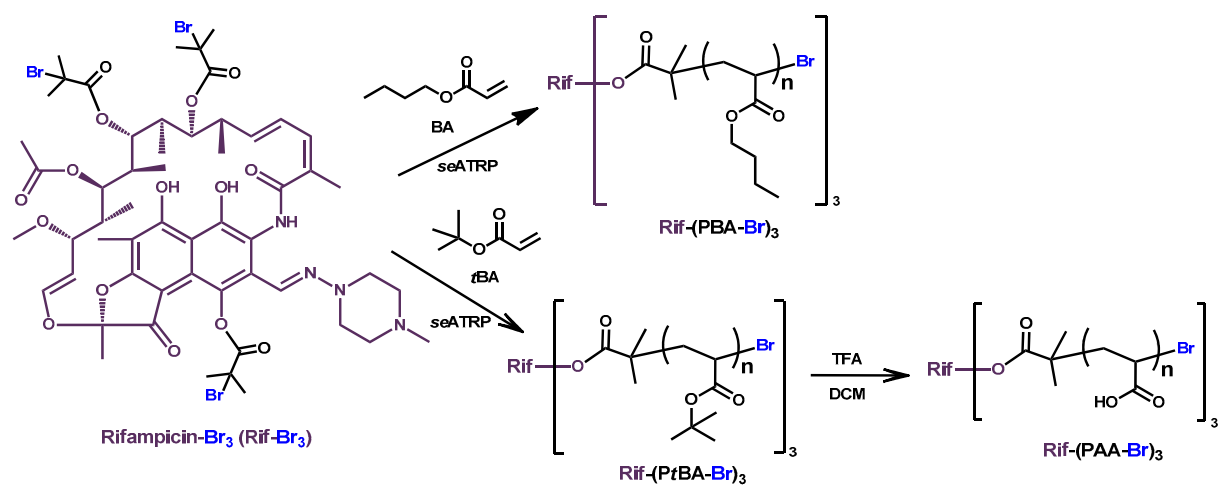

**Figure S7.** Synthetic route for the preparation of rifampicin-based macromolecules with acrylates (P*n*BA and P*t*BA) and poly(acrylic acid) (PAA) side chains.

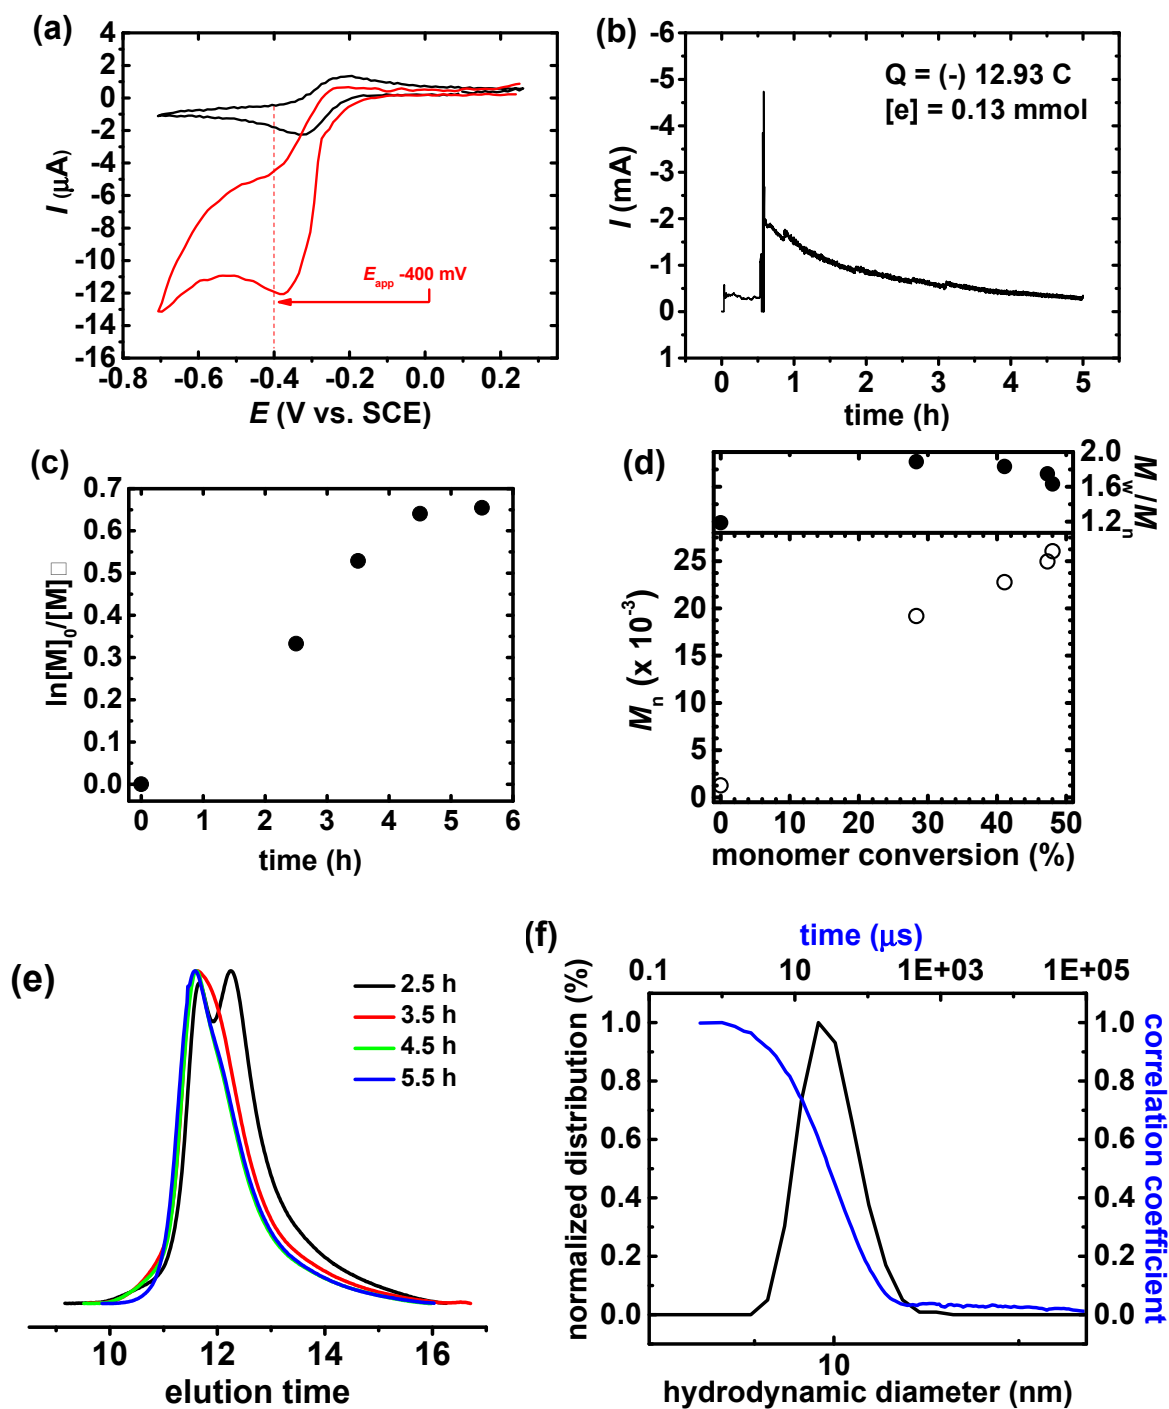

**Figure S8.** (a) Cyclic voltammogram of 0.44 mM Cu<sup>II</sup>Br<sub>2</sub>/TPMA\*<sub>2</sub> in 15% (v/v) *n*BA/DMF ([*n*BA]<sub>0</sub> = 1.10 M) containing 0.2 M TBAP in the absence (black line) and in the presence of 1.35 mM Rif-Br<sub>3</sub> (red line) recorded at  $v = 0.1 \text{ V} \cdot \text{s}^{-1}$ , (b) current profile vs. time for the polymerization of *n*BA from Rif-Br<sub>3</sub>, (c) First-order kinetic plot of monomer conversion vs. time, (d)  $M_n$  and  $M_w/M_n$  vs. monomer conversion, (e) GPC traces of *n*BA polymerization and their evolution over reaction time, (f) DLS hydrodynamic size distributions by volume of Rif-(P*n*BA-Br)<sub>3</sub>. Table 1, entry 1.



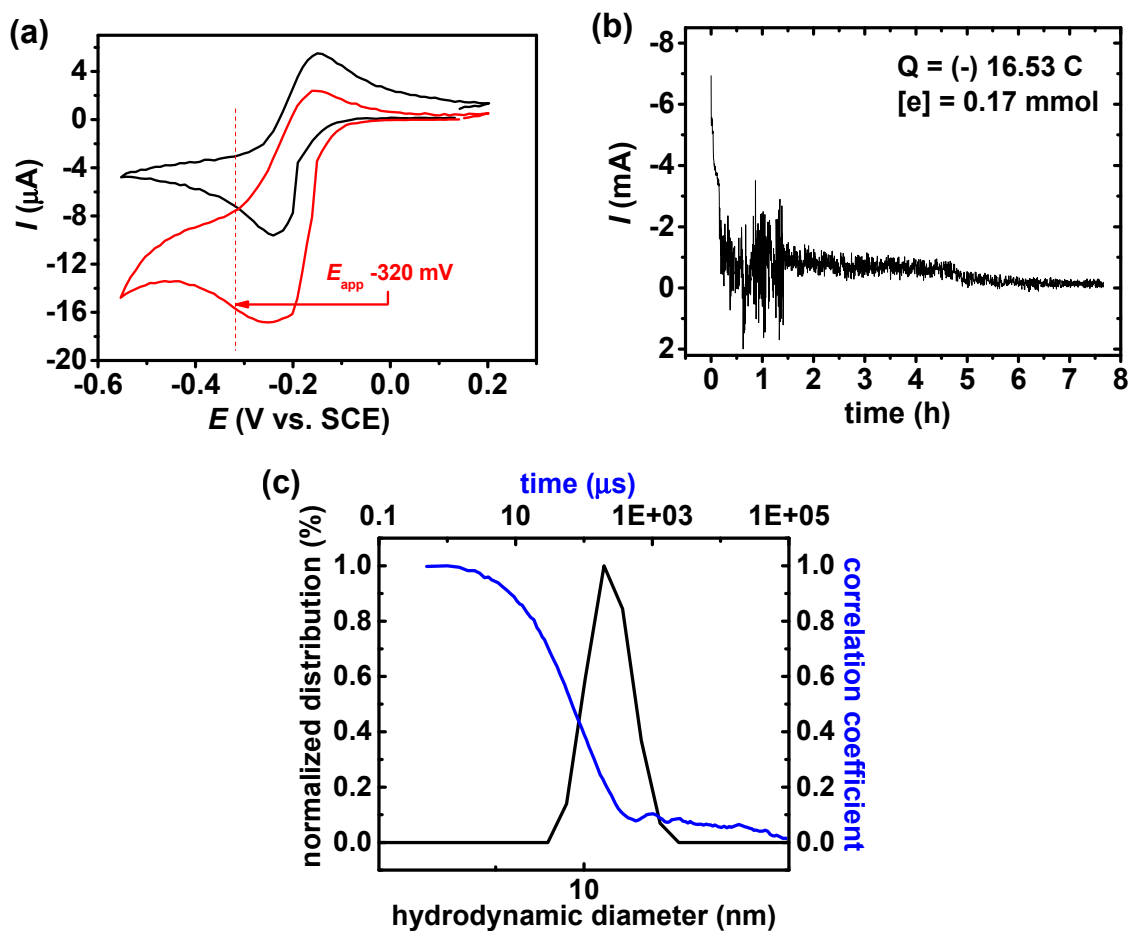

**Figure S9.** (a) Cyclic voltammogram of 0.88 mM  $\text{Cu}^{\text{II}}\text{Br}_2/\text{TPMA}$  in 30% ( $v/v$ )  $n\text{BA}/\text{DMF}$  ( $[n\text{BA}]_0 = 2.19$  M) containing 0.2 M TBAP in the absence (black line) and in the presence of 2.71 mM  $\text{Rif-Br}_3$  (red line) recorded at  $v = 0.1 \text{ V}\cdot\text{s}^{-1}$ , (b) current profile vs. time for the polymerization of  $n\text{BA}$  from  $\text{Rif-Br}_3$ , (c) DLS hydrodynamic size distributions by volume of  $\text{Rif-(P}n\text{BA-Br)}_3$ . Table 1, entry 2.

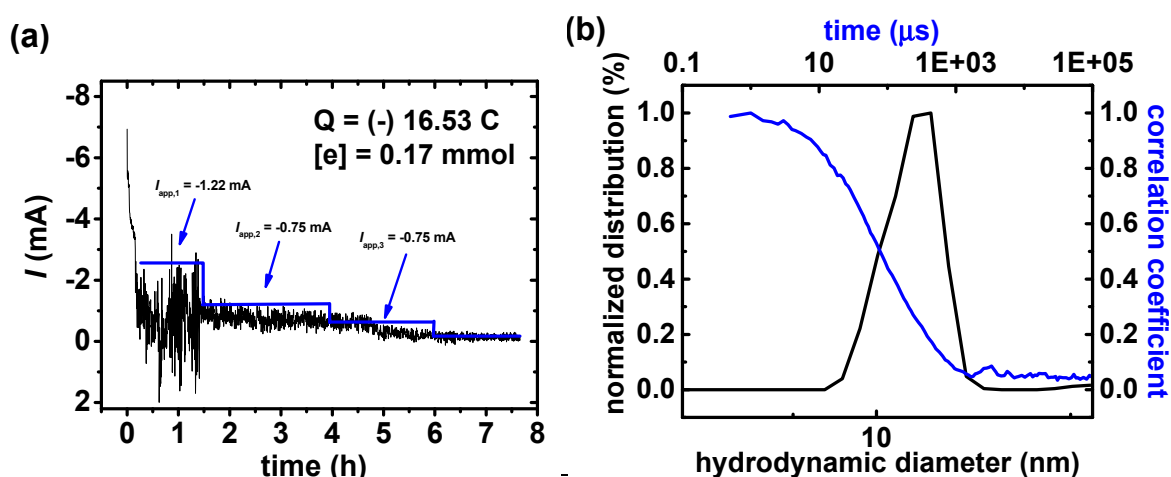

**Figure S10.** (a) Current profile vs. time for the polymerization of  $n\text{BA}$  from  $\text{Rif-Br}_3$  under constant potential conditions and the determined current steps for constant current electrolysis (b) DLS hydrodynamic size distributions by volume of  $\text{Rif-(P}n\text{BA-Br)}_3$ . Table 1, entry 3.

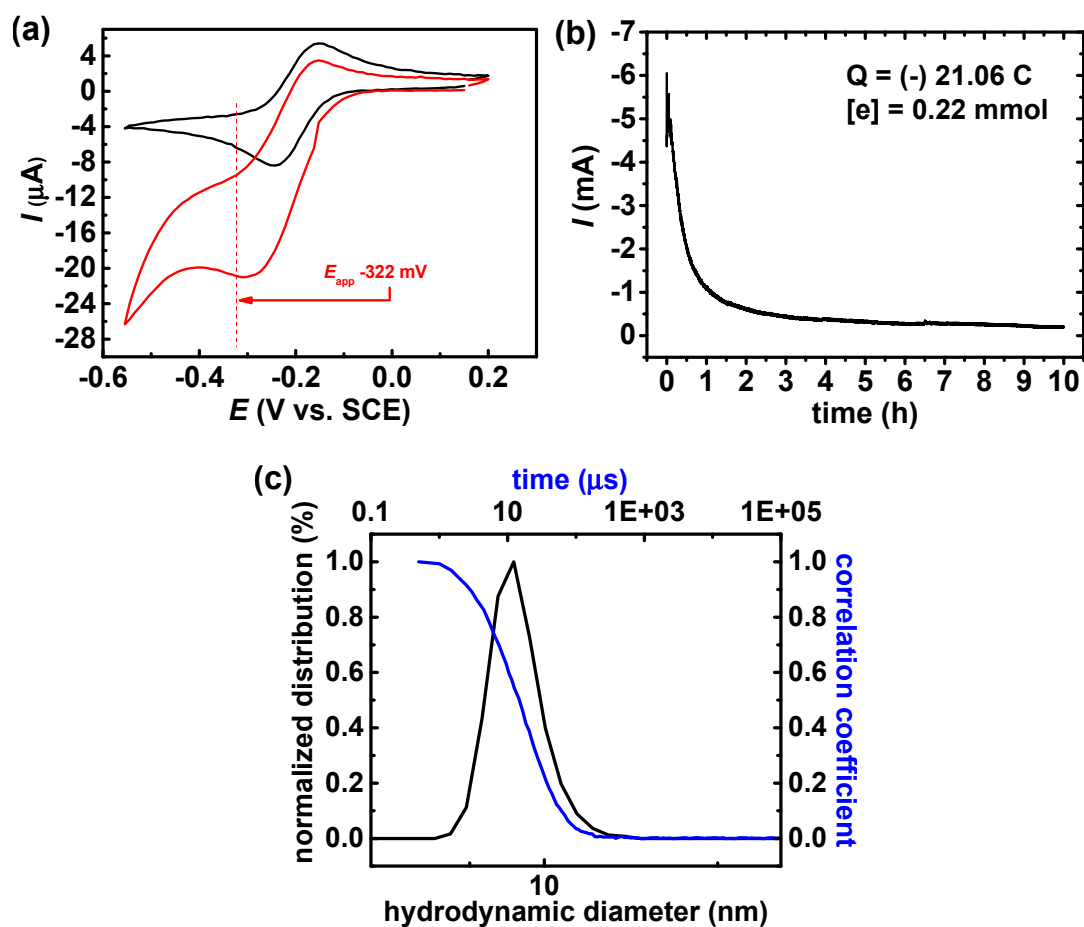

**Figure S11.** (a) Cyclic voltammogram of 0.82 mM Cu<sup>II</sup>Br<sub>2</sub>/TPMA in 30% (v/v) *t*BA/DMF ( $[t\text{BA}]_0 = 2.05 \text{ M}$ ) containing 0.2 M TBAP in the absence (black line) and in the presence of 6.74 mM Rif-Br<sub>3</sub> (red line) recorded at  $v = 0.1 \text{ V}\cdot\text{s}^{-1}$ , (b) current profile vs. time for the polymerization of *t*BA from Rif-Br<sub>3</sub>, (c) DLS hydrodynamic size distributions by volume of Rif-(P*t*BA-Br)<sub>3</sub>. Table 1, entry 4.

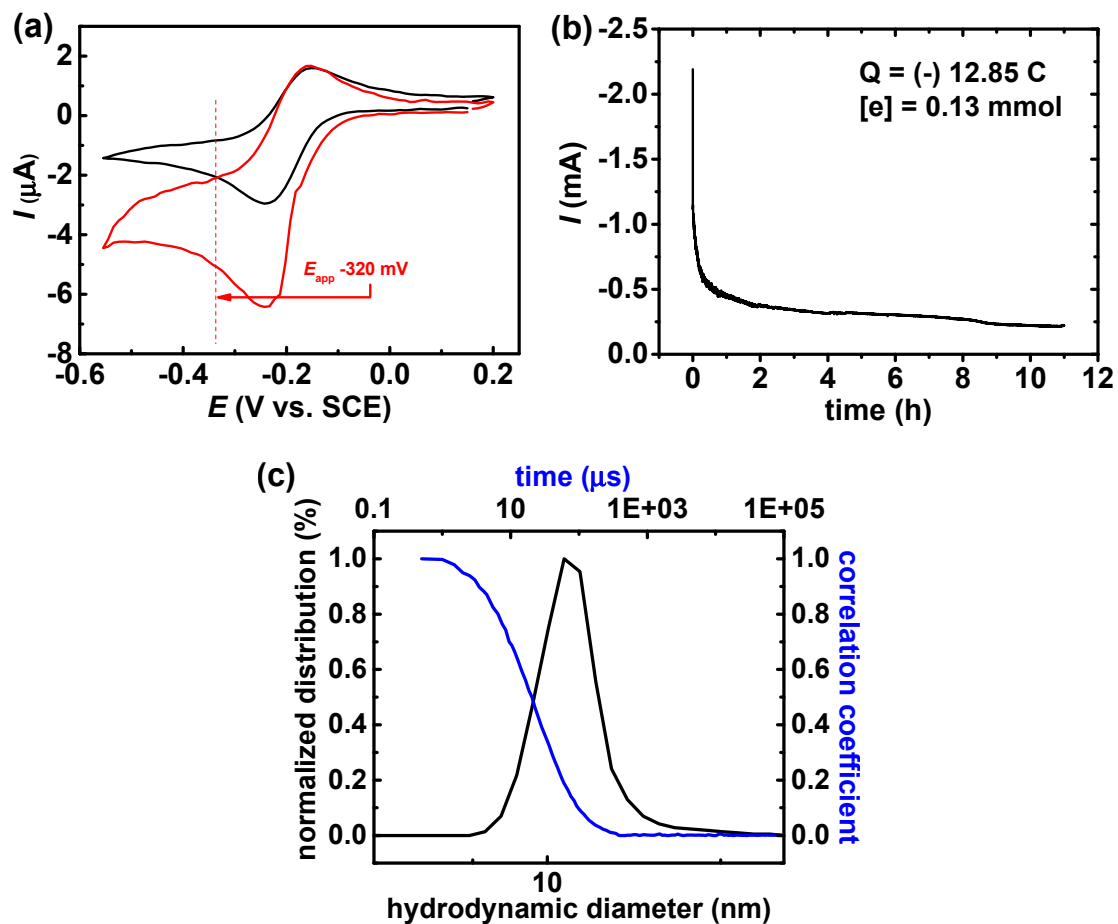

**Figure S12.** (a) Cyclic voltammogram of 0.43 mM  $\text{Cu}^{\text{II}}\text{Br}_2/\text{TPMA}$  in 16% (v/v) *t*BA/DMF ( $[\text{tBA}]_0 = 1.07$  M) containing 0.2 M TBAP in the absence (black line) and in the presence of 1.95 mM Rif-(PtBA-Br)<sub>3</sub> (red line) recorded at  $v = 0.1$  V·s<sup>-1</sup>, (b) current profile vs. time for the polymerization of *t*BA from Rif-(PtBA-Br)<sub>3</sub>, (c) DLS hydrodynamic size distributions by volume of Rif-(PtBA-*b*-PtBA-Br)<sub>3</sub>. Table 1, entry 5.

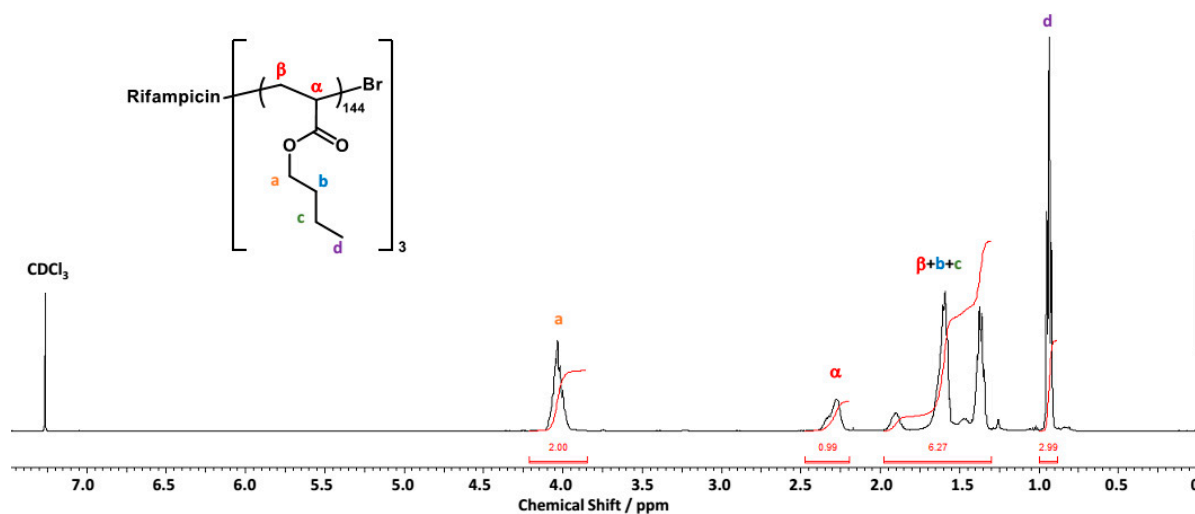

**Figure S13.** <sup>1</sup>H NMR spectrum of Rif-(P*n*BA-Br)<sub>3</sub> polymers ( $M_n = 56100$ ,  $D = 1.59$ ) after purification (in CDCl<sub>3</sub>). Table 1, entry 3.

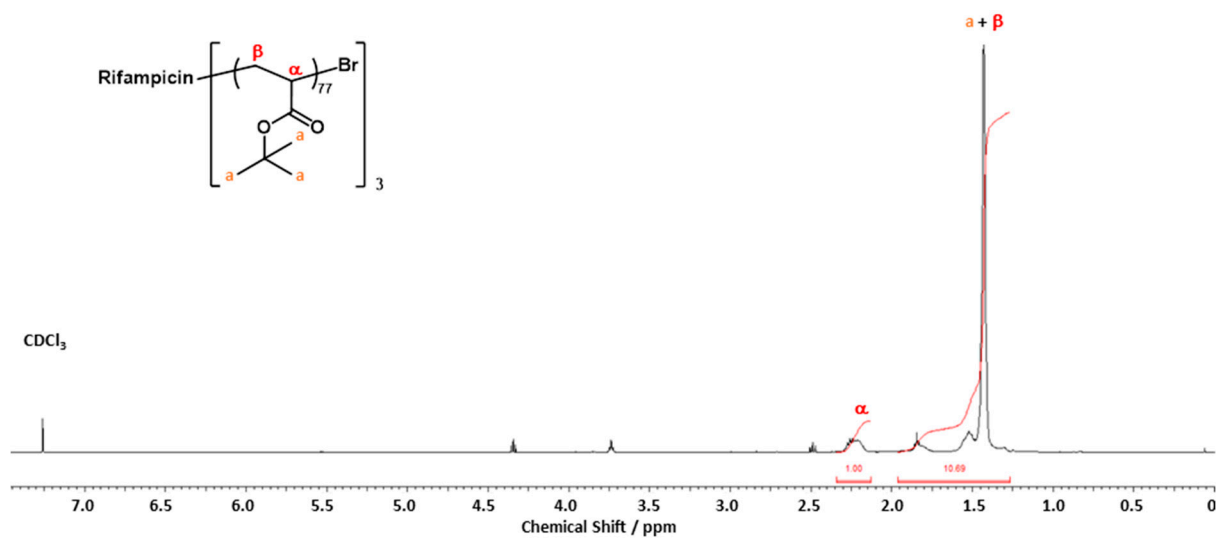

**Figure S14.** <sup>1</sup>H NMR spectrum of Rif-(PtBA-Br)<sub>3</sub> polymers ( $M_n = 30100$ ,  $D = 1.71$ ) after purification (in CDCl<sub>3</sub>). Table 1, entry 4.

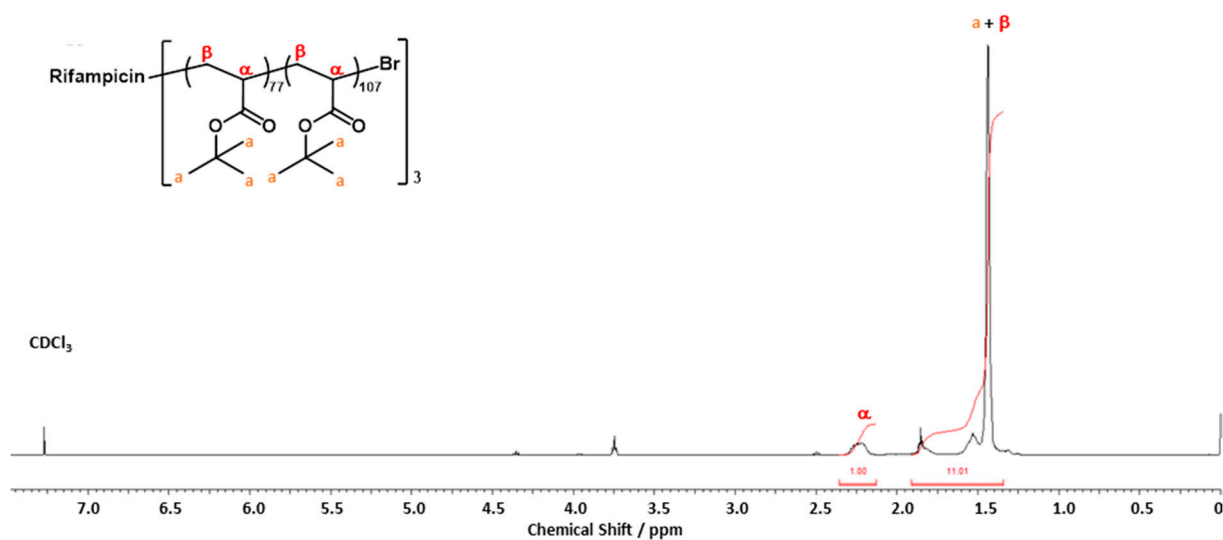

**Figure S15.** <sup>1</sup>H NMR spectrum of Rif-(PtBA-*b*-PtBA-Br)<sub>3</sub> polymers ( $M_n = 72100$ ,  $D = 1.58$ ) after purification (in CDCl<sub>3</sub>). Table 1, entry 5.

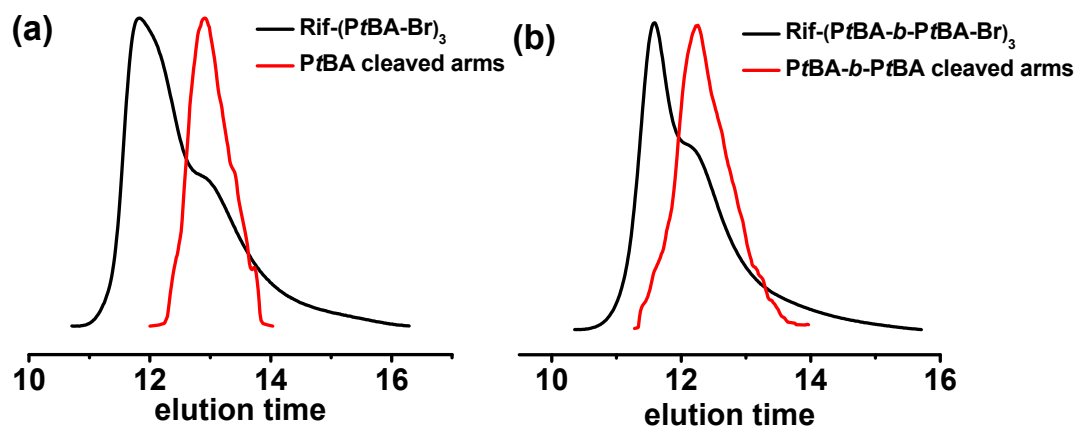

**Figure S16.** GPC traces of (a) Rif-(PtBA-Br)<sub>3</sub> (Table 1, entry 4) and the corresponding cleaved PtBA arms, and (b) Rif-(PtBA-*b*-PtBA-Br)<sub>3</sub> (Table 1, entry 5) and the corresponding cleaved PtBA-*b*-PtBA arms.

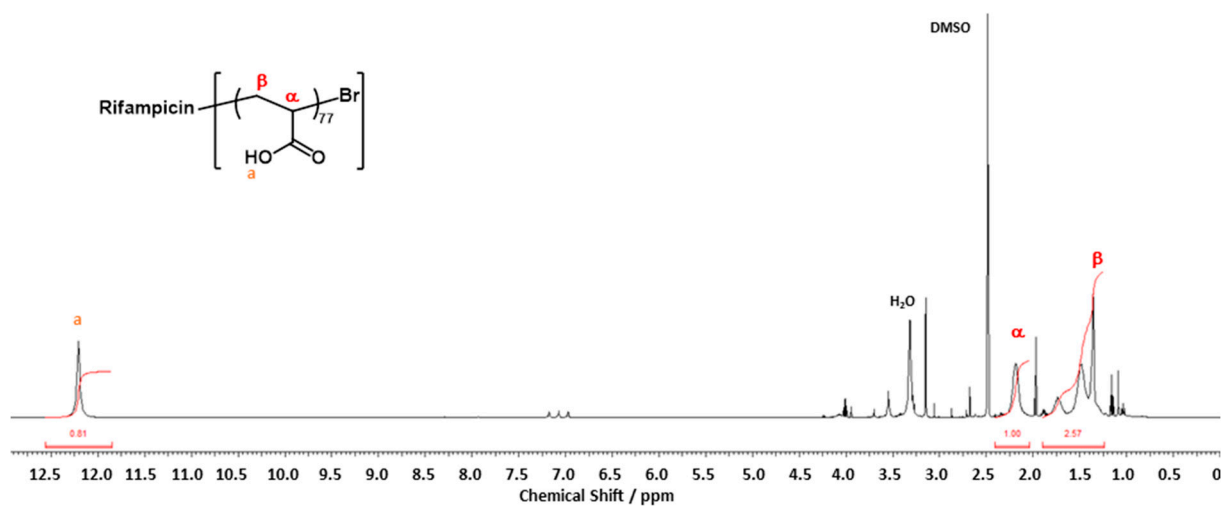

**Figure S17.** <sup>1</sup>H NMR spectrum of Rif-(PAA-Br)<sub>3</sub> polymers after purification (in DMSO-*d*<sub>6</sub>). Table 1, entry 4.

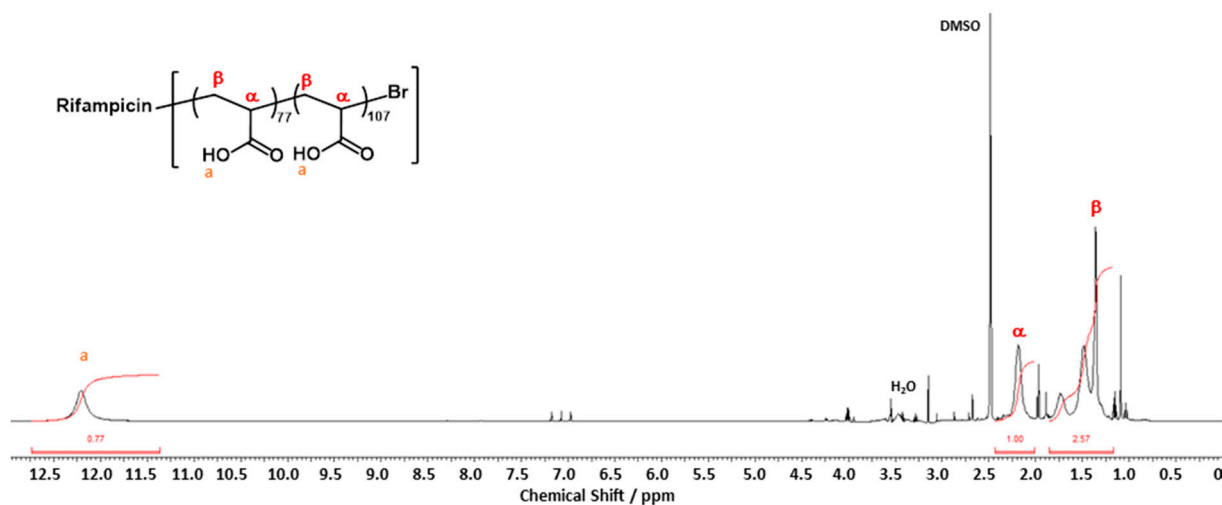

**Figure S18.** <sup>1</sup>H NMR spectrum of Rif-(PAA-*b*-PAA-Br)<sub>3</sub> polymers after purification (in DMSO-*d*<sub>6</sub>). Table 1, entry 5.

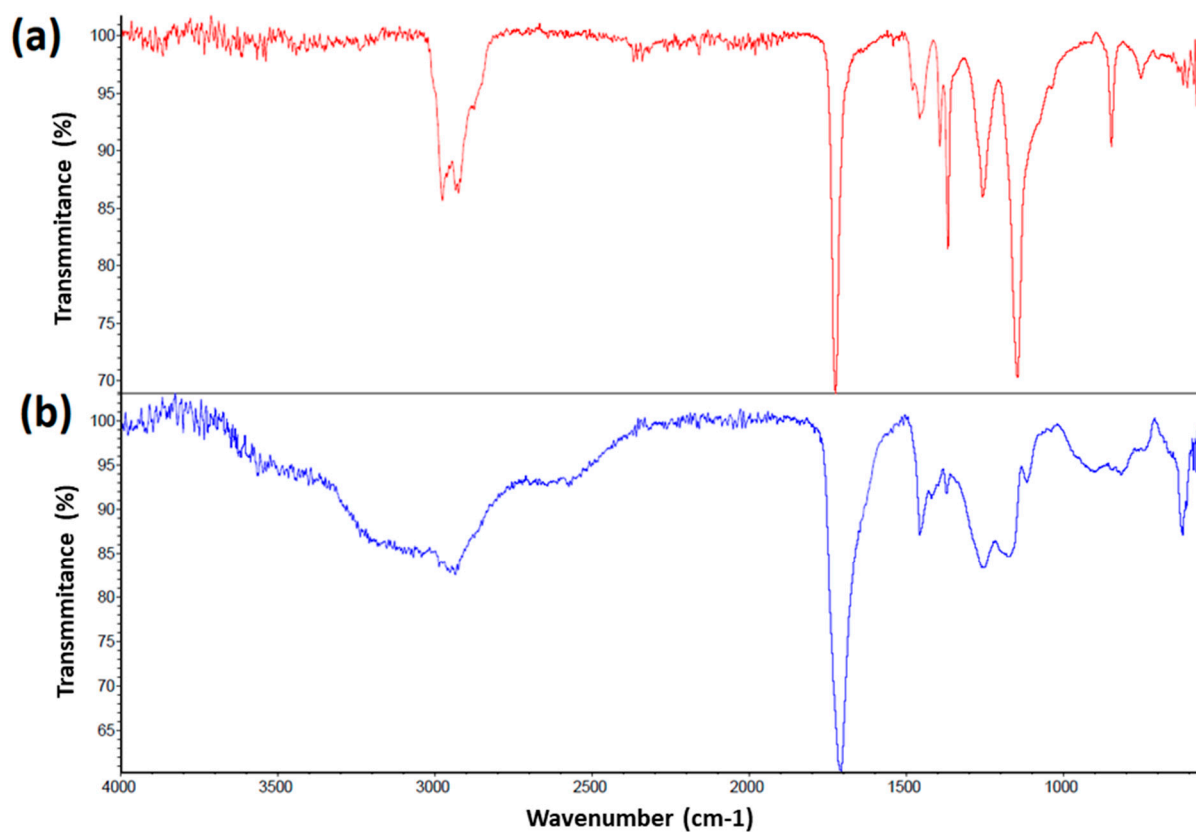

Figure S19. FT-IR characterization of (a) Rif-(PtBA-Br)<sub>3</sub> (Table 1, entry 4) and (b) Rif-(PAA-Br)<sub>3</sub>.

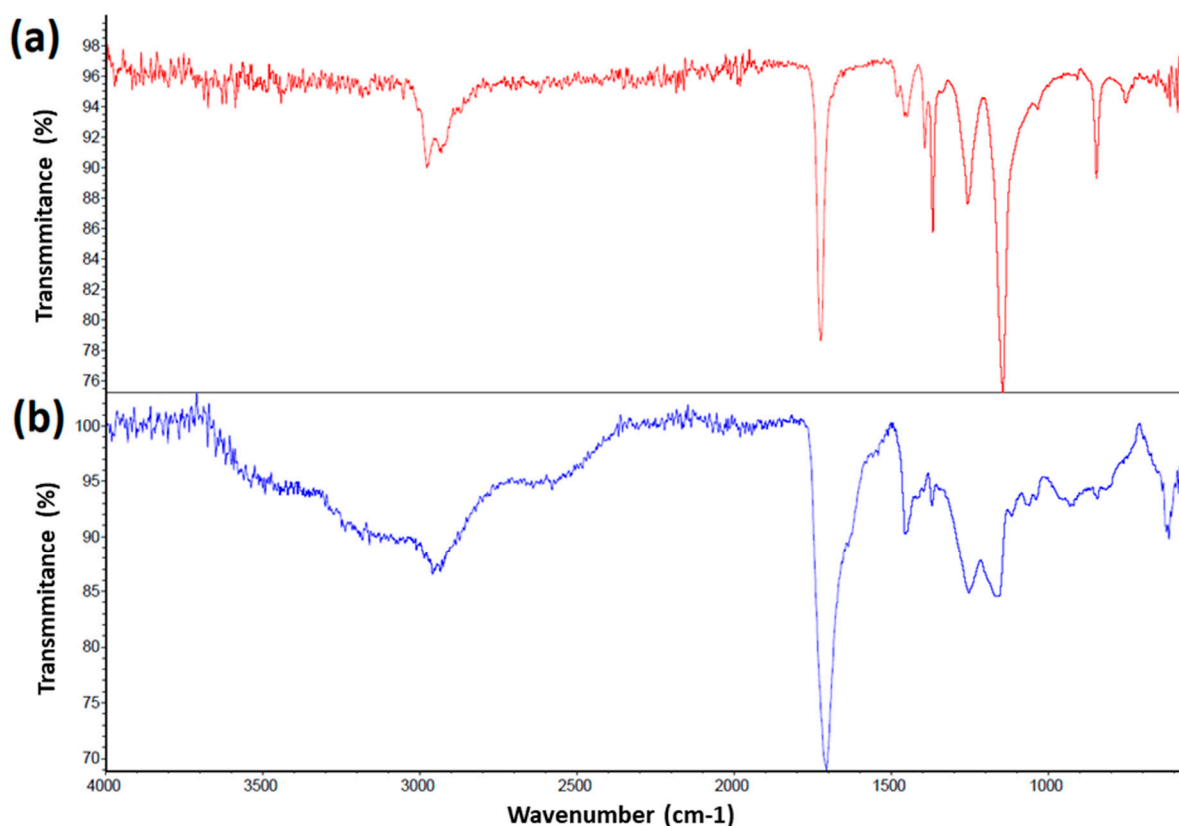

Figure S20. FT-IR characterization of (a) Rif-(PtBA-*b*-PtBA-Br)<sub>3</sub> (Table 1, entry 5) and (b) Rif-(PAA-*b*-PAA-Br)<sub>3</sub>.

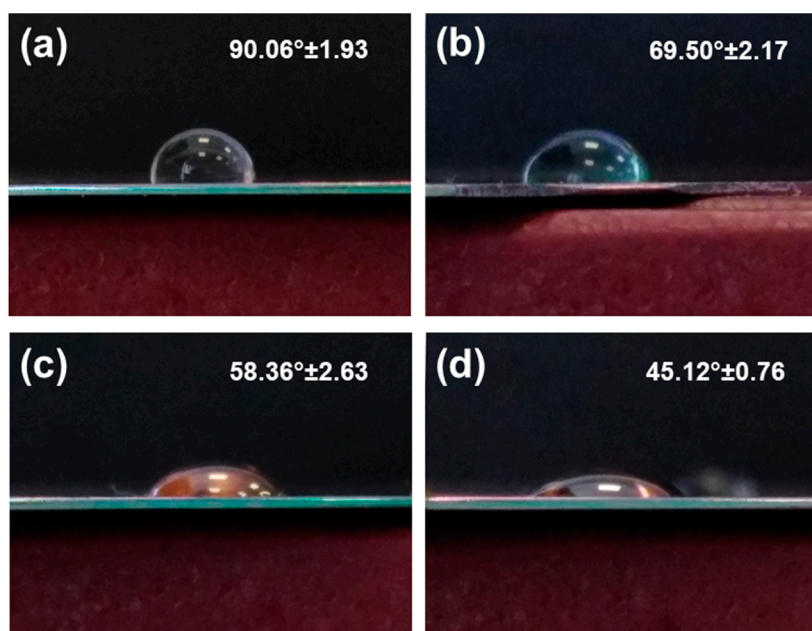

**Figure S21.** Water contact angle images of (a) Rif-(PtBA-Br)<sub>3</sub> (Table 1, entry 4) and (b) corresponding Rif-(PAA-Br)<sub>3</sub>, and diiodomethane contact angle images of (c) Rif-(PtBA-Br)<sub>3</sub> (Table 1, entry 4) and (d) corresponding Rif-(PAA-Br)<sub>3</sub>.

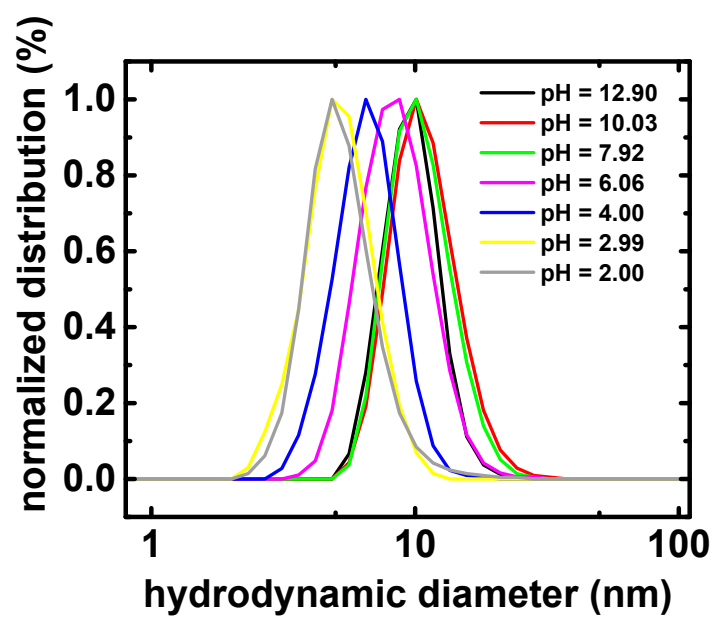

**Figure S22.** DLS hydrodynamic size distributions by volume of Rif-(PtBA-*b*-PtBA-Br)<sub>3</sub> in different pH.

**Table S1.** Calculation of Cu<sup>I</sup>/Cu<sup>II</sup> ratio for the preparation of rifampicin-based macromolecules.

| Entry (according to Table 1) | $k_p^{aPP}$<br>(h <sup>-1</sup> ) <sup>a</sup> | $[P_n^*]$<br>(M × 10 <sup>10</sup> ) <sup>a</sup> | $K_{ATRP}$<br>(× 10 <sup>8</sup> ) <sup>b</sup> | $[P_n-Br]$<br>(mM) | $[Cu^I]/[Cu^{II}]$ <sup>c</sup> | $[Cu^IL^+]$<br>(%) | $[Br-Cu^{III}L^+]$<br>(%) |
|------------------------------|------------------------------------------------|---------------------------------------------------|-------------------------------------------------|--------------------|---------------------------------|--------------------|---------------------------|
| 1                            | 0.133                                          | 13.3                                              | 0.0047                                          | 1.35               | 0.02                            | 2.1                | 97.9                      |
| 2                            | 0.109                                          | 10.9                                              | 1.30                                            | 2.71               | 31.06                           | 96.9               | 3.1                       |
| 3                            | 0.095                                          | 9.53                                              | 1.30                                            | 2.71               | 27.07                           | 96.4               | 3.6                       |
| 4                            | 0.137                                          | 13.3                                              | 1.30                                            | 6.74               | 15.18                           | 93.8               | 6.2                       |
| 5                            | 0.097                                          | 9.42                                              | 1.30                                            | 1.95               | 37.17                           | 97.4               | 2.6                       |

<sup>a</sup> The radical concentration  $[P_n^*]$  was calculated according to the equation defined as  $[P_n^*] = \left(\frac{d\ln[M]}{dt}\right) (k_p)^{-1}$  [1], where  $\frac{d\ln[M]}{dt}$  values were calculated from the first order kinetics plots (S8c in SI, 1a, 2a, 3a and 4a) [2],  $k_p = 2.77 \times 10^4 \text{ M}^{-1}\text{s}^{-1}$  for *n*BA polymerization [3],  $k_p = 2.86 \times 10^4 \text{ M}^{-1}\text{s}^{-1}$  for *t*BA polymerization [4], <sup>b</sup> entry 1:  $K_{ATRP} = 4.7 \times 10^{-5}$  was determined theoretically for the Cu<sup>I</sup>/TPMA<sup>+</sup> catalyst acetonitrile at 25°C [5]; entry 2–5:  $K_{ATRP} = 1.3 \times 10^{-8}$  was determined for the Cu<sup>I</sup>/TPMA<sup>+</sup> catalyst in methyl acrylate/acetonitrile 50/50 (v/v) at 50°C [6] <sup>c</sup> The Cu<sup>I</sup>/Cu<sup>II</sup> ratio was calculated according to the equation defined as  $\frac{[Cu^I/TPMA^+]}{[Br-Cu^{III}TPMA^+]} = \frac{[P_n^*]}{[P_n-Br]K_{ATRP}}$  [6].

**Table S2.** Theoretical Al<sup>3+</sup> concentration in solution and polymer by monomer conversion.

| Entry<br>(according to Table 1 and S1) | $Q^a$<br>(C) | $n_{Al^{3+}}^b$<br>(mol × 10 <sup>5</sup> ) | $[Al^{3+}]_{\text{solution}}^c$<br>(ppm by wt) | $[Al^{3+}]_{\text{polymer}}^d$<br>(ppm by wt) |
|----------------------------------------|--------------|---------------------------------------------|------------------------------------------------|-----------------------------------------------|
| 1                                      | 12.93        | 4.47                                        | 48.9                                           | 11.7                                          |
| 2                                      | 16.53        | 5.71                                        | 98.6                                           | 25.1                                          |
| 3                                      | 16.53        | 5.71                                        | 98.6                                           | 26.3                                          |
| 4                                      | 21.06        | 7.28                                        | 128.0                                          | 48.9                                          |
| 5                                      | 12.85        | 4.44                                        | 87.8                                           | 25.8                                          |

<sup>a</sup> The total passed charge was calculated by integration of the chronoamperometry (CA) area ( $Q = I \cdot t$ ); <sup>b</sup> theoretical amount of Al<sup>3+</sup> in the reaction mixture was calculated from CA:  $n_{Al^{3+}} = Q/F/3$  where  $F = 96485 \text{ C/mol}$ ; <sup>c</sup> the Al concentration in the reaction mixture was calculated according to the equation defined as:  $[Al^{3+}]_{\text{solution}} = [Al^{3+}] \text{ MW}_{Al} / \text{wt}_{\text{total}} \times 1000000$  where solution density was assumed as  $(d) = d_{DMF} \cdot \% (v/v)_{DMF} + d_{monomer} \cdot \% (v/v)_{monomer}$ ; <sup>d</sup> the Al concentration in pure polymer sample was determined as follows:  $[Al^{3+}]_{\text{polymer}} = [Al^{3+}]_{\text{solution}} / df \cdot \text{conversion}$ , where  $df$  is dilute factor,  $df = 2$  [7].

**Table S3.** Calculation of theoretical Dead Chain Fraction (DCF<sub>theo</sub>) for polymerization of acrylates at low copper catalyst loading.

| Entry<br>(according to Table 1) | $[P_n^*]^a$<br>(M × 10 <sup>10</sup> ) | $[D]^b$<br>(M × 10 <sup>6</sup> ) | $[P_n-Br]$<br>(mM) | DCF <sub>theo</sub> <sup>c</sup><br>(%) |
|---------------------------------|----------------------------------------|-----------------------------------|--------------------|-----------------------------------------|
| 1                               | 13.3                                   | 3.52                              | 1.35               | 0.26                                    |
| 2                               | 10.9                                   | 3.30                              | 2.71               | 0.12                                    |
| 3                               | 9.53                                   | 2.51                              | 2.71               | 0.09                                    |
| 4                               | 13.3                                   | 6.37                              | 6.74               | 0.09                                    |
| 5                               | 9.42                                   | 3.52                              | 1.95               | 0.18                                    |

<sup>a</sup> The radical concentration  $[P_n^*]$  was calculated according to the equation defined as  $[P_n^*] = \left(\frac{d\ln[M]}{dt}\right) (k_p)^{-1}$  [1], where  $\frac{d\ln[M]}{dt}$  values were calculated from the first order kinetics plots (Figure 2a) [8], entry 1:  $k_p = 2.86 \times 10^4 \text{ M}^{-1}\text{s}^{-1}$  [4], entry 2-5:  $k_p = 2.77 \times 10^4 \text{ M}^{-1}\text{s}^{-1}$  [9]. <sup>b</sup> The concentration of terminated chains  $[D]$  was calculated according to the equation defined as  $[D] = k_t[P]^2t$  where  $t$  (denote reaction time) = 19800 s (entry 1),  $t = 27601 \text{ s}$  (entry 2 and 3),  $t = 36000 \text{ s}$  (entry 4) and  $t = 39600 \text{ s}$  (entry 5),  $k_t = 1.0 \times 10^8 \text{ M}^{-1}\text{s}^{-1}$  [10]. <sup>c</sup> DCF =  $\left(\frac{[D]}{[P-X]_0}\right) \times 100\%$  [1].



**Table S4.** Results of the detaching of polymer arms from rifampicin-based macromolecules.

| Entry<br>(according<br>to Table 1) | $M_{n,theo}$<br>( $\times 10^{-3}$ ) <sup>a</sup><br>(chain) | $DP_{n,theo}$ <sup>b</sup><br>(chain) | $M_{n,app}$<br>( $\times 10^{-3}$ ) <sup>c</sup><br>(chain) | $DP_{n,app}$ <sup>b</sup><br>(chain) | $M_w/M_n$ <sup>c</sup> | $f_i$ <sup>d</sup><br>(%) |
|------------------------------------|--------------------------------------------------------------|---------------------------------------|-------------------------------------------------------------|--------------------------------------|------------------------|---------------------------|
| 4                                  | 9.9                                                          | 77                                    | 23.4                                                        | 182                                  | 1.20                   | 42                        |
| 5                                  | 23.6                                                         | 184                                   | 44.6                                                        | 348                                  | 1.42                   | 53                        |

<sup>a</sup>  $M_{n,th} = ([tBA]_0/[Rif-Br_3]_0) \times \text{conversion} \times M_{tBA}$ ,  $[tBA]_0$ —initial monomer concentration,  $[Rif-Br_3]_0$ —initiator concentration; <sup>b</sup> established according to Table 1; <sup>c</sup> apparent  $M_n$  and  $M_w/M_n$  of the arms cleaved from the rifampicin-based macromolecules determined by THF GPC (PS standards); <sup>d</sup> efficiency of initiation:  $f_i = (DP_{n,theo} \text{ (per chain)}/DP_{n,app} \text{ (per chain)}) \times 100\%$ .

**Table S5.** Experimental values of contact angles, parameters of free surface energy (FSE) as calculated by Owens-Wendt method for rifampicin-based polymer coatings.

| Entry<br>(according to<br>Table 1) | Polymer | Experimental values of $\theta$ (°) |                       |       |                       | Parameters of FSE<br>(mJ/m <sup>2</sup> )<br>water-<br>diiodomethane |              |               |
|------------------------------------|---------|-------------------------------------|-----------------------|-------|-----------------------|----------------------------------------------------------------------|--------------|---------------|
|                                    |         | Diiodomethane                       | Standard<br>deviation | Water | Standard<br>deviation | $\gamma_s$                                                           | $\gamma_s^d$ | $\gamma_{sp}$ |
|                                    |         |                                     |                       |       |                       |                                                                      |              |               |
| 4                                  | PtBA    | 58.36                               | 2.63                  | 90.06 | 1.93                  | 29.82                                                                | 26.94        | 2.88          |
|                                    | PAA     | 45.12                               | 0.76                  | 69.50 | 2.17                  | 41.09                                                                | 30.32        | 10.77         |
| 5                                  | PtBA    | 70.64                               | 1.30                  | 92.34 | 0.96                  | 23.54                                                                | 19.55        | 3.99          |
|                                    | PAA     | 50.49                               | 0.91                  | 81.96 | 1.75                  | 35.01                                                                | 30.06        | 4.95          |

**Table S6.** Volume mean diameter of rifampicin-based macromolecules at varying pH.<sup>a</sup>

| Sample | pH    | Hydrodynamic<br>diameter<br>(nm) |
|--------|-------|----------------------------------|
| 1      | 12.90 | 14.59 ± 0.60                     |
| 2      | 10.03 | 11.96 ± 0.80                     |
| 3      | 7.92  | 11.48 ± 1.16                     |
| 4      | 6.06  | 9.21 ± 1.35                      |
| 5      | 4.00  | 6.96 ± 0.50                      |
| 6      | 2.99  | 5.48 ± 0.84                      |
| 7      | 2.00  | 5.70 ± 0.29                      |

<sup>a</sup> The experiment was conducted for the polymer sample received according to Table 1, entry 5 after acidic hydrolysis.

## References

1. Zhong, M.; Matyjaszewski, K. How fast can a CRP be conducted with preserved chain end functionality? *Macromolecules* **2011**, *44*, 2668–2677, doi:10.1021/ma102834s.
2. Chmielarz, P.; Kryszewski, P.; Wang, Z.; Wang, Y.; Matyjaszewski, K. Synthesis of well-defined polymer brushes from silicon wafers via surface-initiated seATRP. *Macromol. Chem. Phys.* **2017**, *218*, 1700106, doi:10.1002/macp.201700106.
3. Buback, M.; Kurz, C.H.; Schmaltz, C. Pressure dependence of propagation rate coefficients in free-radical homopolymerizations of methyl acrylate and dodecyl acrylate. *Macromol. Chem. Phys.* **1998**, *199*, 1721–1727, doi:10.1002/(SICI)1521-3935(19980801)199:8<1721::AID-MACP1721>3.0.CO;2-5.
4. Dervaux, B.; Junkers, T.; Schneider-Baumann, M.; Du Prez, F.E.; Barner-Kowollik, C. Propagation rate coefficients of isobornyl acrylate, *tert*-butyl acrylate and 1-ethoxyethyl acrylate: A high frequency PLP-SEC study. *J. Polym. Sci. A Polym. Chem.* **2009**, *47*, 6641–6654, doi:10.1002/pola.23706.
5. Bortolamei, N.; Isse, A.A.; Di Marco, V.B.; Gennaro, A.; Matyjaszewski, K. Thermodynamic properties of copper complexes used as catalysts in atom transfer radical polymerization. *Macromolecules* **2010**, *43*, 9257–9267, doi:10.1021/ma101979p.

6. Wang, Y.; Kwak, Y.; Buback, J.; Buback, M.; Matyjaszewski, K. Determination of ATRP equilibrium constants under polymerization conditions. *ACS Macro Lett.* **2012**, *1*, 1367–1370, doi:10.1021/mz3005378.
7. Chmielarz, P. Synthesis of  $\alpha$ -D-glucose-based star polymers through simplified electrochemically mediated ATRP. *Polymer* **2016**, *102*, 192–198, doi: 10.1016/j.polymer.2016.09.007.
8. Chmielarz, P.; Fantin, M.; Park, S.; Isse, A.A.; Gennaro, A.; Magenau, A.J.D.; Sobkowiak, A.; Matyjaszewski, K. Electrochemically mediated atom transfer radical polymerization (*e*ATRP). *Prog. Polym. Sci.* **2017**, *69*, 47–78, doi:10.1016/j.progpolymsci.2017.02.005.
9. Buback, M.; Kurz, C.H.; Schmaltz, C. Pressure dependence of propagation rate coefficients in free-radical homopolymerizations of methyl acrylate and dodecyl acrylate. *Macromolecular Chemistry and Physics* **1998**, *199*, 1721–1727, doi:10.1002/(SICI)1521-3935(19980801)199:8<1721::AID-MACP1721>3.0.CO;2-5.
10. Barth, J.; Buback, M.; Hesse, P.; Sergeeva, T. Termination and transfer kinetics of butyl acrylate radical polymerization studied via SP-PLP-EPR. *Macromolecules* **2010**, *43*, 4023–4031, doi:10.1021/ma1006039.

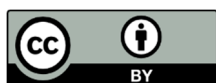

© 2020 by the authors. Submitted for possible open access publication under the terms and conditions of the Creative Commons Attribution (CC BY) license (<http://creativecommons.org/licenses/by/4.0/>).
